# Supplementary material for: Utilization of a ligand containing 2,2′-bipyridyl and tetrazolate groups to construct a 2D Co(ii) coordination polymer: spin canting and metamagnetism
Source: Royal Society of Chemistry journal article supplement (doi:10.1039/c4dt01793e), 2014-08-22
Supplement: c4dt01793e1.pdf [file c4dt01793e1.pdf]

# Utilization of Ligand Containing 2,2'-Bipyridyl and Tetrazolate Groups to Construct of a 2D Co(II) Coordination Polymer: Spin Canting and Metamagnetism

Jia-Dong Tsai and Chen-I Yang\*

Department of Chemistry, Tunghai University, Taichung 407, Taiwan

|                    | Index                                                                                                                                                                                   | Page |
|--------------------|-----------------------------------------------------------------------------------------------------------------------------------------------------------------------------------------|------|
| <b>Table 1S.</b>   | Selected bond distances (Å) and angles (°) for compound <b>1</b> .                                                                                                                      | S2   |
| <b>Figure. S1.</b> | Thermogravimetric (TG) analysis diagram of compound <b>1</b> .                                                                                                                          | S3   |
| <b>Figure. S2.</b> | Simulated PXRD pattern (red) and experimental PXRD pattern of compound <b>1</b> .                                                                                                       | S4   |
| <b>Figure. S3.</b> | Perspective view of interlayer $\pi$ - $\pi$ interactions in <b>1</b> (dashed line).                                                                                                    | S5   |
| <b>Figure. S4.</b> | Plot of $\chi_M^{-1}$ (○) vs. temperature for a microcrystalline sample of compound <b>1</b> . The solid line represents the best fit $\chi_M^{-1}$ above 100 K with a Curie–Weiss law. | S6   |
| <b>Figure. S5.</b> | FC and ZFC magnetization plots of compound <b>1</b> at the field of 150 G.                                                                                                              | S7   |
| <b>Figure. S6.</b> | Isothermal magnetization of compound <b>1</b> at the indicated temperatures.                                                                                                            | S8   |
| <b>Figure. S7.</b> | $dM/dH$ vs. $H$ plots for the virgin magnetization of compound <b>1</b> .                                                                                                               | S9   |

**Table 1S.** Selected bond distances (Å) and angles (°) for compound **1**.

| <b>1</b>        |            |                     |           |
|-----------------|------------|---------------------|-----------|
| Co(1)-N(7)      | 2.089(2)   | Co(1)-N(2)          | 2.122(2)  |
| Co(1)-N(3)      | 2.105(2)   | Co(1)-N(9)#1        | 2.141(3)  |
| Co(1)-N(1)      | 2.111(2)   | Co(1)-N(6)#2        | 2.165(2)  |
|                 |            |                     |           |
| N(6)-Co(1)#3    | 2.165(2)   | N(1)-Co(1)-N(2)     | 73.50(9)  |
| N(9)-Co(1)#4    | 2.141(3)   | N(2)-Co(1)-N(9)#1   | 94.05(9)  |
| N(7)-Co(1)-N(3) | 133.85(10) | N(7)-Co(1)-N(6)#2   | 86.87(10) |
| N(7)-Co(1)-N(1) | 149.82(9)  | N(3)-Co(1)-N(6)#2   | 91.98(9)  |
| N(3)-Co(1)-N(1) | 76.28(9)   | N(1)-Co(1)-N(6)#2   | 90.87(9)  |
| N(7)-Co(1)-N(2) | 76.34(10)  | N(2)-Co(1)-N(6)#2   | 87.67(8)  |
| N(3)-Co(1)-N(2) | 149.77(10) | N(9)#1-Co(1)-N(6)#2 | 173.47(9) |

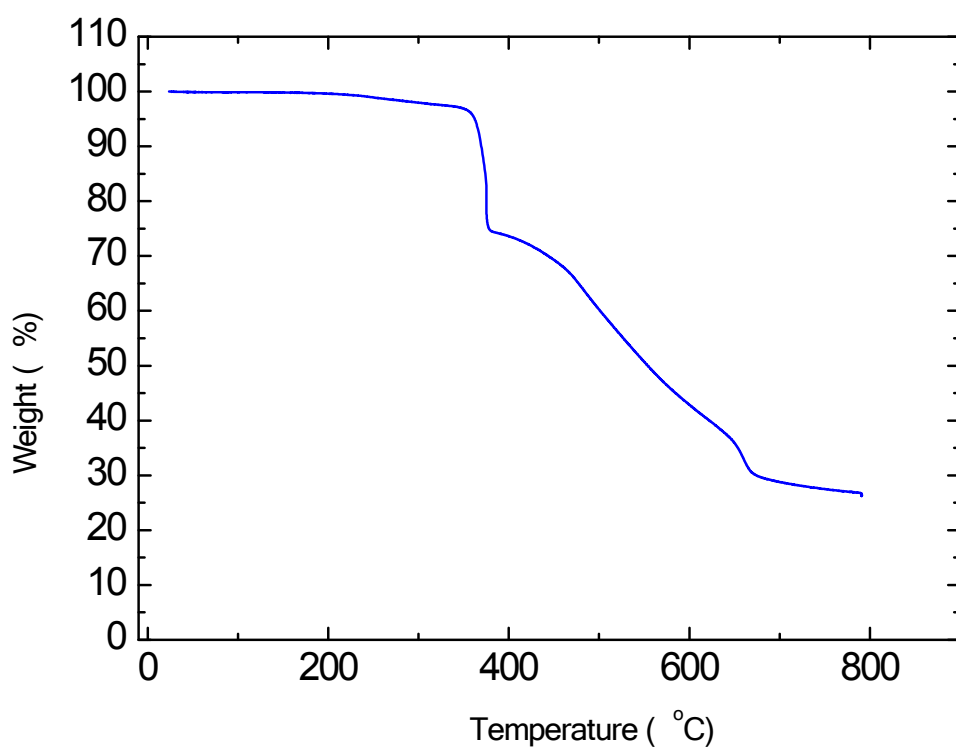

**Fig. 1S.** Thermogravimetric (TG) analysis diagram of compound **1**.

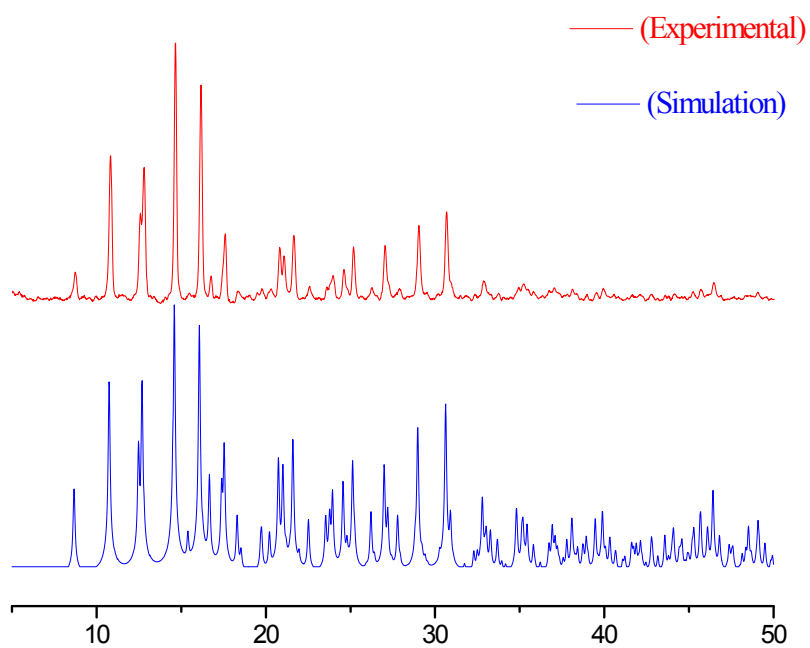

**Fig. 2S.** Simulated PXRD pattern (red) and experimental PXRD pattern of compound **1**.

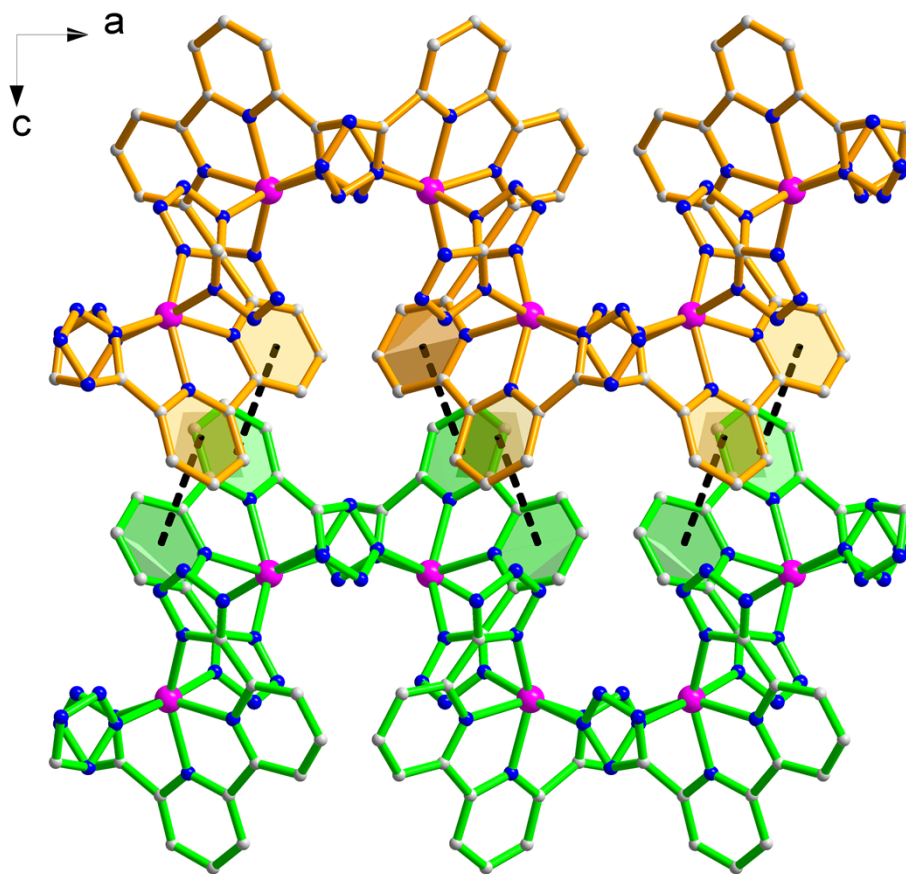

**Fig. 3S.** Perspective view of interlayer  $\pi$ - $\pi$  interactions in **1** (dashed line).

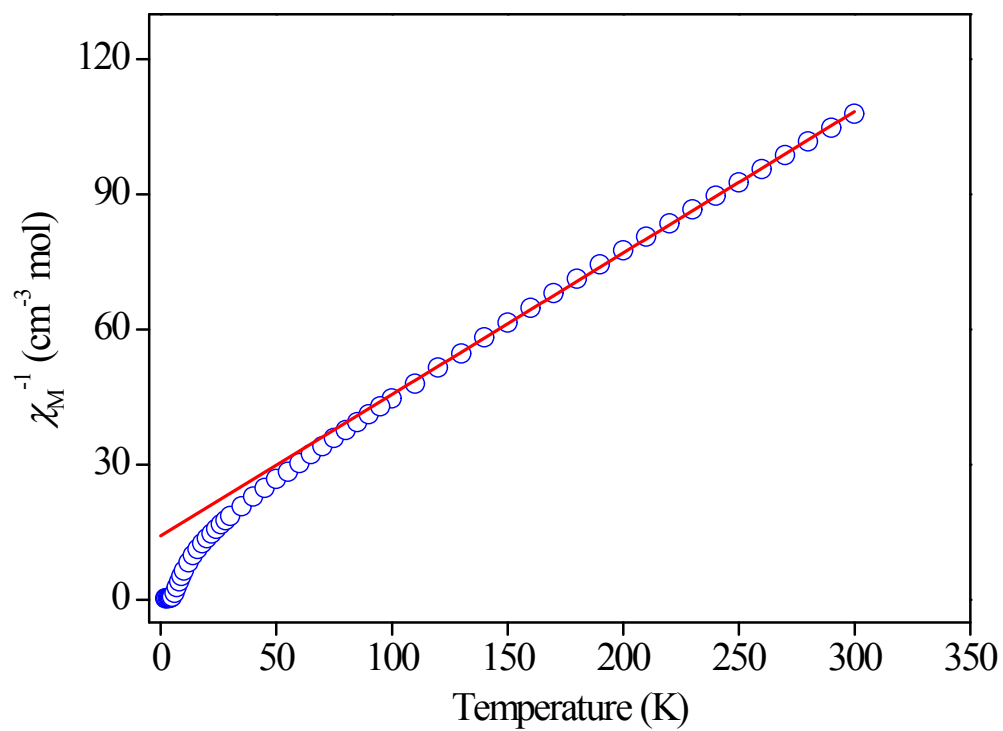

**Fig. 4S.** Plot of  $\chi_M^{-1}$  ( $\circ$ ) vs. temperature for a microcrystalline sample of compound **1**. The solid line represents the best fit  $\chi_M^{-1}$  above 100 K with a Curie–Weiss law.

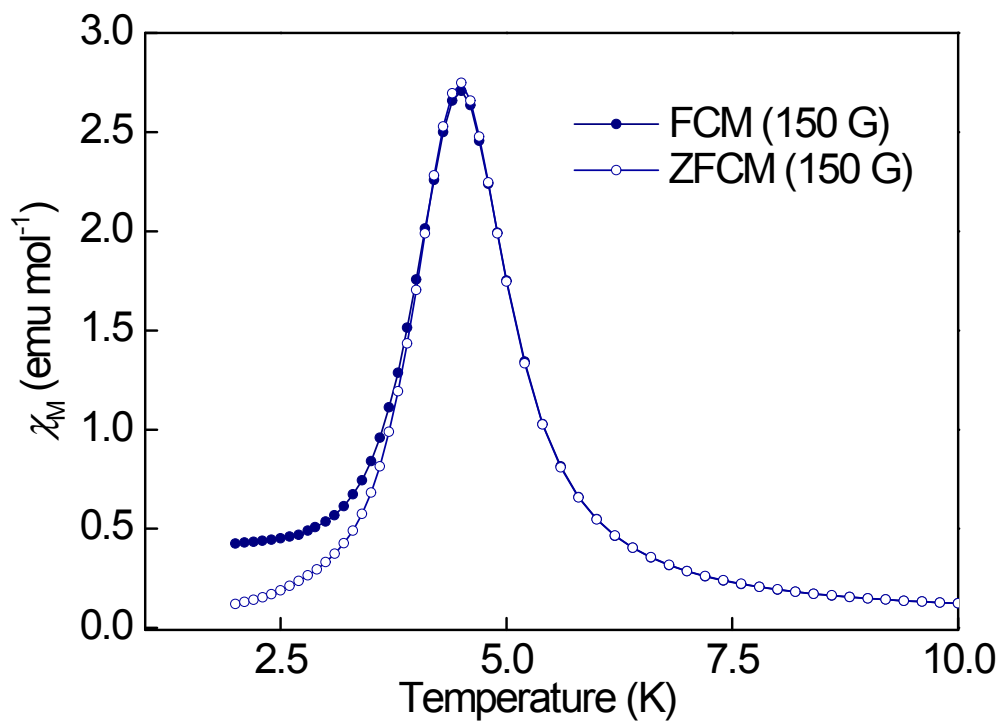

**Fig. 5S.** FC and ZFC magnetization plots of compound **1** at the field of 150 G.

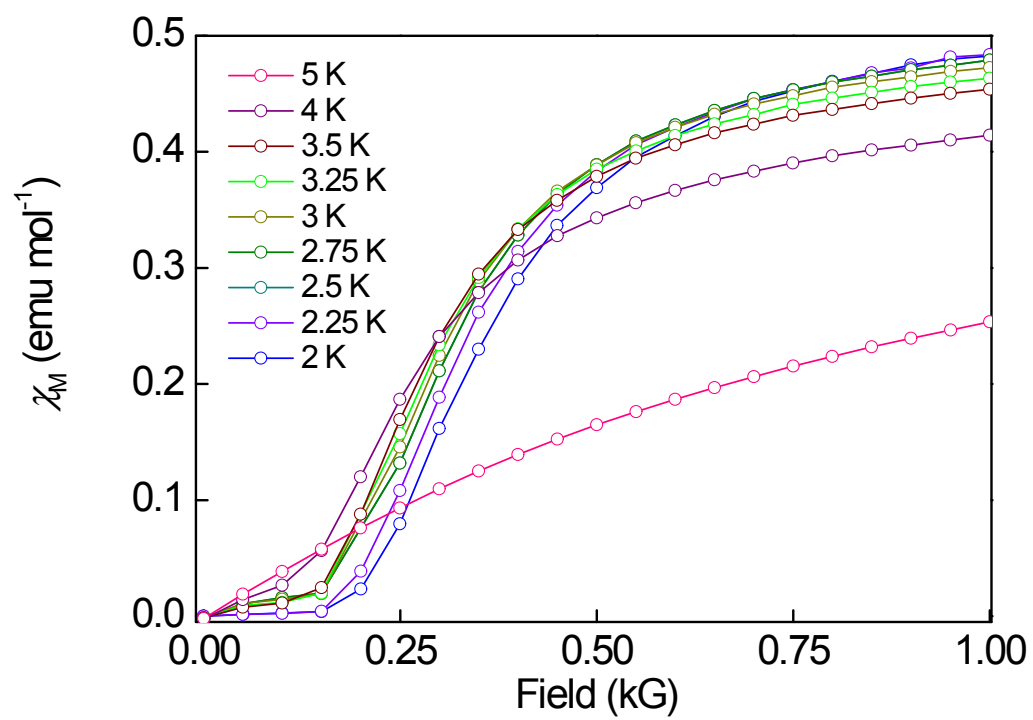

Fig. 6S. Isothermal magnetization of compound 1 at the indicated temperatures.



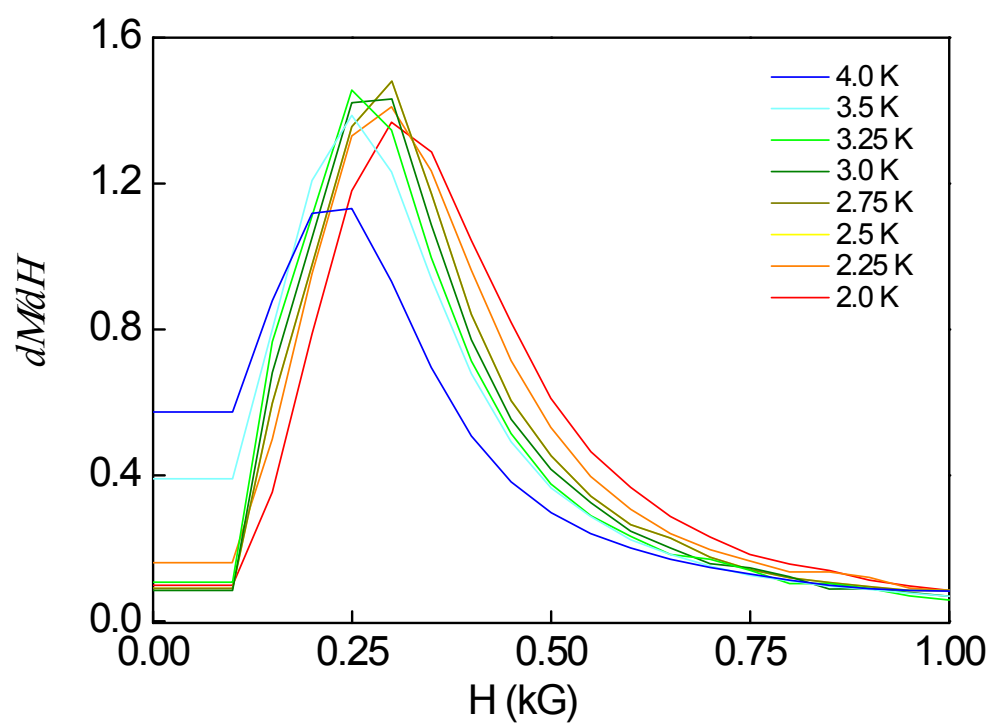

**Fig. 7S.**  $dM/dH$  vs.  $H$  plots for the virgin magnetization of compound 1.
